# Supplementary material for: Effect of malocclusion on jaw motor function and chewing in children: a systematic review
Source: PubMed Central journal article supplement (PMC8898242; doi:10.1007/s00784-021-04356-y), 2022-01-05
Supplement: 784_2021_4356_MOESM1_ESM.pdf [file 784_2021_4356_MOESM1_ESM.pdf]

## 1. Medline (Ovid)

1. exp Mastication/
2. Bite Force/
3. exp Masticatory Muscles/
4. or/1-3
  
5. Electromyography/
6. exp Biomechanical Phenomena/
7. Movement/
8. (develop\* or efficienc\* or behav\* or rate\* or function\* or perform\* or evaluat\* or activit\* or physiolog\* or electromyogra\* or movement\* or freq\* or speed\* or rhythm\* or kinemat\* or pattern\* or system\* or videograph\* or optic\*).ti,ab,kf.
9. or/5-8
  
10. 4 and 9
  
11. ((chew\* or masticat\*) adj3 (develop\* or efficienc\* or behav\* or rate\* or function\* or perform\* or evaluat\* or activit\* or physiolog\* or electromyogra\* or movement\* or freq\* or speed\* or rhythm\* or kinemat\* or pattern\* or system\* or videograph\* or optic\*)).ti,ab,kf.
12. 10 or 11
  
13. limit 12 to "all child (0 to 18 years)"
  
14. (infant\* or infancy or baby\* or babies or child\* or schoolchild\* or school age\* or preschool\* or kid or kids or toddler\* or adoles\* or teen\* or boy\* or girl\*).ti,ab,kf.
  
15. 12 and 14
  
16. 13 or 15
  
17. remove duplicates from 16
  
18. limit 17 to english language

## 2. Embase (embase.com)

('mastication'/de OR 'masticatory muscle'/exp

AND

'electromyography'/de OR 'kinematics'/de OR 'biomechanics'/de OR 'movement (physiology)'/de OR develop\*:ti,ab OR efficienc\*:ti,ab OR behav\*:ti,ab OR rate\*:ti,ab OR function\*:ti,ab OR perform\*:ti,ab OR evaluat\*:ti,ab OR activit\*:ti,ab OR physiolog\*:ti,ab OR electromyogra\*:ti,ab OR movement\*:ti,ab OR freq\*:ti,ab OR speed\*:ti,ab OR rhythm\*:ti,ab OR kinemat\*:ti,ab OR pattern\*:ti,ab OR system\*:ti,ab OR videograph\*:ti,ab OR optic\*:ti,ab

OR

((chew\* OR masticat\*) NEAR/3 (develop\* OR efficienc\* OR behav\* OR rate\* OR function\* OR perform\* OR evaluat\* OR activit\* OR physiolog\* OR electromyogra\* OR movement\* OR freq\* OR speed\* OR rhythm\* OR kinemat\* OR pattern\* OR system\* OR videograph\* OR optic\*)):ti,ab

AND ([adolescent]/lim OR [child]/lim)

OR 'mastication'/de OR 'masticatory muscle'/exp

AND

'electromyography'/de OR 'kinematics'/de OR 'biomechanics'/de OR 'movement (physiology)'/de OR develop\*:ti,ab OR efficienc\*:ti,ab OR behav\*:ti,ab OR rate\*:ti,ab OR function\*:ti,ab OR perform\*:ti,ab OR evaluat\*:ti,ab OR activit\*:ti,ab OR physiolog\*:ti,ab OR electromyogra\*:ti,ab OR movement\*:ti,ab OR freq\*:ti,ab OR speed\*:ti,ab OR rhythm\*:ti,ab OR kinemat\*:ti,ab OR pattern\*:ti,ab OR system\*:ti,ab OR videograph\*:ti,ab OR optic\*:ti,ab

OR

((chew\* OR masticat\*) NEAR/3 (develop\* OR efficienc\* OR behav\* OR rate\* OR function\* OR perform\* OR evaluat\* OR activit\* OR physiolog\* OR electromyogra\* OR movement\* OR freq\* OR speed\* OR rhythm\* OR kinemat\* OR pattern\* OR system\* OR videograph\* OR optic\*)):ti,ab

AND

infant\*:ti,ab OR infancy:ti,ab OR baby\*:ti,ab OR babies:ti,ab OR child\*:ti,ab OR schoolchild\*:ti,ab OR 'school age\*':ti,ab OR preschool\*:ti,ab OR kid:ti,ab OR kids:ti,ab OR toddler\*:ti,ab OR adoles\*:ti,ab OR teen\*:ti,ab OR boy\*:ti,ab OR girl\*:ti,ab)

AND [english]/lim

### 3. Web of Science Core Collection

TS=((chew\* OR masticat\*) NEAR/3 (develop\* OR efficienc\* OR behav\* OR rate\* OR function\* OR perform\* OR evaluat\* OR activit\* OR physiolog\* OR electromyogra\* OR movement\* OR freq\* OR speed\* OR rhythm\* OR kinemat\* OR pattern\* OR system\* OR videograph\* OR optic\*))

AND

TS=(infant\* OR infancy OR baby\* OR babies OR child\* OR schoolchild\* OR "school age\*" OR preschool\* OR kid OR kids OR toddler\* OR adoles\* OR teen\* OR boy\* OR girl\*)

Refined by: LANGUAGES: ( ENGLISH )

Indexes=SCI-EXPANDED, SSCI, A&HCI, CPCI-S, CPCI-SSH, ESCI Timespan=All years
